# Supplementary material for: Detection of Quebec Polyomavirus DNA in Samples from Different Patient Groups
Source: MDPI journal article supplement (doi:10.3390/microorganisms9051082), 2021-05-18
Supplement: s1 [file s1]

|       |                                     |
|-------|-------------------------------------|
| HPyV6 | TVAAGAANLFGPPVEKQTS-KEPSKG---EL 387 |
| QPyV  | PSTADAAKVTVAPPKKTIGPKDQNKDKNDL 388  |
| HPyV7 | NAAAAAAKISVAPKKNTDNKKEL----- 380    |
|       | : * **:: * :: . *:                  |

**Figure S1.** Nucleotide sequence and amino acid sequence alignment of the QPyV, HPyV6, and HPyV7 VP1. **(A)** Nucleotide sequence alignment of the VP1 gene. The primer sequences are underlined. **(B)** Amino acid sequence alignment of the VP1 gene. The residues corresponding to the amplified gene fragment are underlined.
